# Supplementary material for: A MAC Protocol for Medical Monitoring Applications of Wireless Body Area Networks
Source: Sensors (Basel). 2015 Jun 3;15(6):12906–31. doi: 10.3390/s150612906 (PMC4507673; doi:10.3390/s150612906)
Supplement: Supplementary file 1 [file sensors-15-12906-s001.xlsx]

## Sheet: Sheet1
0.1	0.04688	0.04751	0.05101	0.0515	0.05051	0.05076	0.05001	0.05052
0.2	0.09375	0.0944	0.10101	0.1015	0.10051	0.10081	0.10001	0.1006
0.3	0.14063	--	0.15101	--	0.15051	--	0.15001	--
0.4	0.1875	0.1881	0.20102	0.2015	0.20052	0.20081	0.20002	0.2006
0.5	0.23438	--	0.25103	--	0.25053	--	0.25003	--
0.6	0.28125	--	0.30103	--	0.30053	--	0.30003	--
0.7	0.32813	0.32876	0.35103	0.35154	0.35053	0.35079	0.35003	0.35054
0.8	0.375	--	0.40104	--	0.40054	--	0.40004	--
0.9	0.42188	--	0.45105	--	0.45055	--	0.45005	--
1	0.46875	0.46939	0.50105	0.5016	0.50055	0.5008	0.50005	0.50056
2	0.9375	0.9381	1.0011	1.0012	1.0006	1.00085	1.0001	1.0006
3	1.40625	--	1.50115	--	1.50065	--	1.50015	--
4	1.875	--	2.0012	--	2.0007	--	2.0002	--
5	2.34375	2.34439	2.50125	2.5017	2.50075	2.50102	2.50025	2.5008
6	2.8125	--	3.0013	--	3.0008	--	3.0003	--
7	3.28125	3.2819	3.50135	3.5018	3.50085	3.50108	3.50035	3.5008
8	3.75	--	4.0014	--	4.0009	--	4.0004	--
9	4.21875	--	4.50145	--	4.50095	--	4.50045	--
10	4.6875	4.688	5.0015	5.002	5.001	5.00125	5.0005	5.001
20	9.375	9.3756	10.002	10.0026	10.0015	10.0018	10.001	10.0016
30	14.0625		15.0025		15.002	--	15.0015
node-delay-beacon-interval

## Sheet: Sheet2
1	0.23438	0.23438	0.27291	0.27251	0.27244	0.27292	0.27232	0.27408
2	0.23438	0.23447	0.26172	0.26304	0.26125	0.26096	0.26114	0.25995
3	0.23438	--	0.25759	--	0.25712	--	0.25701	--
4	0.23438	0.23438	0.25547	0.25741	0.255	0.25509	0.25488	0.25681
5	0.23438	--	0.25424	--	0.25377	--	0.25365	--
6	0.23438	--	0.25347	--	0.253	--	0.25289	--
7	0.23438	0.23204	0.25297	0.2526	0.2525	0.25226	0.25238	0.2519
8	0.23438	--	0.25261	--	0.25214	--	0.25203	--
9	0.23438	--	0.25236	--	0.25189	--	0.25177	--
10	0.23438	0.23236	0.25217	0.25095	0.2517	0.25016	0.25158	0.25283
20	0.23438	0.2348	0.25151	0.2513	0.25104	0.25151	0.25093	0.25069
30	0.23438	--	0.25138	--	0.25091	--	0.25079	--
40	0.23438	0.23204	0.25133	0.25215	0.25086	0.2519	0.25074	0.25077
50	0.23438	--	0.25131	--	0.25084	--	0.25072	--
60	0.23438	--	0.25129	--	0.25083	--	0.25071	--
70	0.23438	0.23339	0.25129	0.24985	0.25082	0.25034	0.2507	0.25092
80	0.23438	--	0.25128	--	0.25081	--	0.2507	--
90	0.23438	--	0.25128	--	0.25081	--	0.25069	--
100	0.23438	0.23487	0.25128	0.25118	0.25081	0.25151	0.25069	0.25156
200	0.23438	0.23447	0.25127	0.25302	0.2508	0.24971	0.25068	0.24966
300	0.23438	--	0.25127	--	0.2508	--	0.25068	--
400	0.23438	0.23441	0.25127	0.2491	0.2508	0.24926	0.25068	0.24988
500	0.23438	--	0.25127	--	0.2508	--	0.25068	--
600	0.23438	--	0.25127	--	0.2508	--	0.25068	--
700	0.23438	0.23225	0.25127	0.25289	0.2508	0.24811	0.25068	0.25037
800	0.23438	--	0.25127	--	0.2508	--	0.25068	--
900	0.23438	--	0.25127	--	0.2508	--	0.25068	--
1000	0.23438	0.23492	0.25127	0.25007	0.2508	0.25102	0.25068	0.24738
2000	0.23438	0.23448	0.25127	0.25089	0.2508	0.24954	0.25068	0.25198
3000	0.23438	--	0.25127	--	0.2508	--	0.25068	--
4000	0.23438	0.2347	0.25127	0.25075	0.2508	0.25027	0.25068	0.2497
5000	0.23438	--	0.25127	--	0.2508	--	0.25068	--
6000	0.23438	--	0.25127	--	0.2508	--	0.25068	--
7000	0.23438	0.23393	0.25127	0.2478	0.2508	0.25213	0.25068	0.2511
8000	0.23438	--	0.25127	--	0.2508	--	0.25068	--
9000	0.23438	--	0.25127	--	0.2508	--	0.25068	--
10000	0.23438	0.23443	0.25127	0.25138	0.2508	0.25085	0.25068	0.2501
node-delay-event-interval

## Sheet: Sheet3
1	0.46548	0.46481	1.66398	1.66692	1.60998	1.62039	1.59648	1.59572	1.23409
2	0.37674	0.37864	1.0097	1.00857	0.9557	0.95135	0.9422	0.94028	0.61711
3	0.34716	--	0.76669	--	0.71269	--	0.69919	--	0.40544
4	0.33237	0.33489	0.62835	0.62858	0.57435	0.57869	0.56085	0.56407	0.29689
5	0.3235	--	0.53723	--	0.48323	--	0.46973	--	0.23092
7	0.31335	0.31291	0.42584	0.42545	0.37184	0.37113	0.35834	0.35643	0.15572
8	0.31018	--	0.39006	--	0.33606	--	0.32256	--	0.13262
9	0.30772	--	0.36223	--	0.30823	--	0.29473	--	0.11495
10	0.30575	0.30427	0.34013	0.33804	0.28613	0.28755	0.27263	0.27127	0.10106
20	0.29687	0.29662	0.24731	0.24777	0.19331	0.19313	0.17981	0.1791	0.04314
30	0.29392	--	0.22148	--	0.16748	--	0.15398	--	0.02649
40	0.29244	0.29339	0.21021	0.21107	0.15621	0.15622	0.14271	0.14206	0.0189
50	0.29155	--	0.20409	--	0.15009	--	0.13659	--	0.01463
60	0.29096	--	0.2003	--	0.1463	--	0.1328	--	0.0119
70	0.29054	0.28846	0.19776	0.19738	0.14376	0.14389	0.13026	0.13112	0.01002
80	0.29022	--	0.19594	--	0.14194	--	0.12844	--	0.00865
90	0.28997	--	0.19458	--	0.14058	--	0.12708	--	0.0076
100	0.28977	0.28967	0.19353	0.19407	0.13953	0.14001	0.12603	0.1263	0.00678
200	0.28889	0.2909	0.18921	0.1884	0.13521	0.13466	0.12171	0.12306	0.00325
300	0.28859	--	0.18793	--	0.13393	--	0.12043	--	0.00213
400	0.28844	0.28596	0.18732	0.18617	0.13332	0.1329	0.11982	0.11939	0.00159
500	0.28835	--	0.18696	--	0.13296	--	0.11946	--	0.00126
600	0.2883	--	0.18673	--	0.13273	--	0.11923	--	0.00105
700	0.28825	0.29012	0.18657	0.18457	0.13257	0.1324	0.11907	0.11964	0.000897118
800	0.28822	--	0.18644	--	0.13244	--	0.11894	--	0.000783615
900	0.2882	--	0.18635	--	0.13235	--	0.11885	--	0.000695602
1000	0.28818	0.28681	0.18627	0.18644	0.13227	0.13054	0.11877	0.119	0.000625361
2000	0.28809	0.28765	0.18594	0.18501	0.13194	0.13263	0.11844	0.1194	0.000311144
3000	0.28806	--	0.18583	--	0.13183	--	0.11833	--	0.000207087
4000	0.28804	0.28746	0.18578	0.18538	0.13178	0.13126	0.11828	0.11823	0.000155187
5000	0.28804	--	0.18575	--	0.13175	--	0.11825	--	0.000124087
6000	0.28803	--	0.18572	--	0.13172	--	0.11822	--	0.000103372
7000	0.28803	0.28405	0.18571	0.18669	0.13171	0.13193	0.11821	0.11814	8.85834e-05
8000	0.28802	--	0.1857	--	0.1317	--	0.1182	--	7.74967e-05
9000	0.28802	--	0.18569	--	0.13169	--	0.11819	--	6.88764e-05
10000	0.28802	0.28815	0.18568	0.18572	0.13168	0.13138	0.11818	0.11869	6.19819e-05
node-power-event-interval

## Sheet: Sheet4
0.1	1.44	1.4366	0.9	0.9023	0.63	0.6312	0.5625	0.562
0.2	0.72	0.721	0.45	0.4495	0.315	0.3148	0.28125	0.281
0.3	0.48	--	0.3	--	0.21	--	0.1875	--
0.4	0.36	0.3613	0.225	0.2248	0.1575	--	0.14063	0.1405
0.5	0.288	--	0.18	--	0.126	--	0.1125	--
0.6	0.24	--	0.15	--	0.105	--	0.09375	--
0.7	0.20571	0.2062	0.12857	0.1285	0.09	0.0901	0.08036	0.0803
0.8	0.18	--	0.1125	--	0.07875	--	0.07031	--
0.9	0.16	--	0.1	--	0.07	--	0.0625	--
1	0.144	0.145	0.09	0.0887	0.063	0.0631	0.05625	0.0562
2	0.072	0.0718	0.045	0.0449	0.0315	0.03151	0.02813	0.02812
3	0.048	--	0.03	--	0.021	--	0.01875	--
4	0.036	0.0358	0.0225	0.0224	0.01575	0.01576	0.01406	0.0141
5	0.0288	--	0.018	--	0.0126	--	0.01125	--
6	0.024	--	0.015	--	0.0105	--	0.00937	--
7	0.02057	0.0203	0.01286	0.0128	0.009	0.00902	0.00804	0.00802
8	0.018	--	0.01125	--	0.00788	--	0.00703	--
9	0.016	--	0.01	--	0.007	--	0.00625	--
10	0.0144	0.0143	0.009	0.00902	0.0063	0.00631	0.00563	0.00563
20	0.0072		0.0045		0.00315		0.00281
30	0.0048		0.003		0.0021		0.00187
node-power-without-event

## Sheet: Sheet5
1	6.37	6.40661	5.00781	5.00621	4.96701	4.98517	4.95681	4.92953
2	6.37	6.38332	2.75469	2.75095	2.71389	2.71723	2.70369	2.69688
3	6.37	--	1.88399	--	1.84319	--	1.83299	--
4	6.37	6.3627	1.40925	1.41465	1.36845	1.36628	1.35825	1.36655
5	6.37	--	1.11915	--	1.07835	--	1.06815	--
6	6.37	--	0.92848	--	0.88768	--	0.87748	--
7	6.37	6.35703	0.796	0.79317	0.7552	0.76011	0.745	0.74559
8	6.37	--	0.69981	--	0.65901	--	0.64881	--
9	6.37	--	0.62745	--	0.58665	--	0.57645	--
10	6.37	6.36694	0.57141	0.56951	0.53061	0.53039	0.52041	0.51784
20	6.37	6.35703	0.34611	0.3452	0.30531	0.30658	0.29511	0.29522
30	6.37	--	0.28346	--	0.24266	--	0.23246	--
40	6.37	6.40661	0.25498	0.25421	0.21418	0.21342	0.20398	0.20363
50	6.37	--	0.23887	--	0.19807	--	0.18787	--
60	6.37	--	0.22856	--	0.18776	--	0.17756	--
70	6.37	6.3361	0.22141	0.22238	0.18061	0.18055	0.17041	0.17007
80	6.37	--	0.21616	--	0.17536	--	0.16516	--
90	6.37	--	0.21216	--	0.17136	--	0.16116	--
100	6.37	6.3581	0.20899	0.20929	0.16819	0.16846	0.15799	0.15774
200	6.37	6.34485	0.19527	0.19672	0.15447	0.15424	0.14427	0.14402
300	6.37	--	0.19089	--	0.15009	--	0.13989	--
400	6.37	6.34126	0.18873	0.18828	0.14793	0.14726	0.13773	0.13809
500	6.37	--	0.18745	--	0.14665	--	0.13645	--
600	6.37	--	0.1866	--	0.1458	--	0.1356	--
700	6.37	6.40203	0.18599	0.18659	0.14519	0.14517	0.13499	0.13545
800	6.37	--	0.18554	--	0.14474	--	0.13454	--
900	6.37	--	0.18519	--	0.14439	--	0.13419	--
1000	6.37	6.38332	0.18491	0.18514	0.14411	0.14356	0.13391	0.13378
2000	6.37	6.44061	0.18365	0.18464	0.14285	0.14222	0.13265	0.13196
3000	6.37	--	0.18323	--	0.14243	--	0.13223	--
4000	6.37	6.34719	0.18302	0.18297	0.14222	0.14263	0.13202	0.13231
5000	6.37	--	0.1829	--	0.1421	--	0.1319	--
6000	6.37	--	0.18282	--	0.14202	--	0.13182	--
7000	6.37	6.40075	0.18276	0.18269	0.14196	0.14291	0.13176	0.1318
8000	6.37	--	0.18271	--	0.14191	--	0.13171	--
9000	6.37	--	0.18268	--	0.14188	--	0.13168	--
10000	6.37	6.382	0.18265	0.18318	0.14185	0.14151	0.13165	0.13255
node-timeslot-event-interval

## Sheet: Sheet6
0.1	6.85	6.8	0.8	0.801	0.68	0.68	0.65	0.65
0.2	6.55	6.52	0.4	0.4	0.34	0.34	0.325	0.325
0.3	6.45	--	0.26667	--	0.22667	--	0.21667	--
0.4	6.4	6.39	0.2	0.2	0.17	0.17	0.1625	0.1625
0.5	6.37	--	0.16	--	0.136	--	0.13	--
0.6	6.35	--	0.13333	--	0.11333	--	0.10833	--
0.7	6.33571	6.31	0.11429	0.114	0.09714	0.09714	0.09286	0.09286
0.8	6.325	--	0.1	--	0.085	--	0.08125	--
0.9	6.31667	--	0.08889	--	0.07556	--	0.07222	--
1	6.31	6.31	0.08	0.08	0.068	0.068	0.065	0.065
2	6.28	6.27	0.04	0.04	0.034	0.034	0.0325	0.0325
3	6.27	--	0.02667	--	0.02267	--	0.02167	--
4	6.265	6.26	0.02	0.02	0.017	0.017	0.01625	0.01625
5	6.262	--	0.016	--	0.0136	--	0.013	--
6	6.26	--	0.01333	--	0.01133	--	0.01083	--
7	6.25857	6.26	0.01143	0.01143	0.00971	0.00971	0.00929	0.00929
8	6.2575	--	0.01	--	0.0085	--	0.00813	--
9	6.25667	--	0.00889	--	0.00756	--	0.00722	--
10	6.256	6.255	0.008	0.008	0.0068	0.0068	0.0065	0.0065
20	6.253		0.004		0.0034		0.00325
30	6.252		0.00267		0.00227		0.00217
timeslot-usage
